# Supplementary material for: A bifunctional catalyst for efficient dehydrogenation and electro-oxidation of hydrazine
Source: Royal Society of Chemistry journal article supplement (doi:10.1039/c8ta06219f), 2018-01-01
Supplement: c8ta06219f1.pdf [file c8ta06219f1.pdf]

## Electronic Supplementary Information

### **A Bifunctional Catalyst for Efficient Dehydrogenation and Electro-oxidation of Hydrazine**

Jun Wang,<sup>a,b</sup> Asim Khaniya,<sup>a</sup> Lin Hu,<sup>c</sup> Melanie J. Beazley,<sup>d</sup> William E. Kaden<sup>a,b</sup> and Xiaofeng  
Feng<sup>\*a,b,c</sup>

<sup>a</sup> Department of Physics, University of Central Florida, Orlando, Florida 32816, United States

<sup>b</sup> Energy Conversion and Propulsion Cluster, University of Central Florida, Orlando, Florida  
32816, United States

<sup>c</sup> Department of Materials Science and Engineering, University of Central Florida, Orlando,  
Florida 32816, United States

<sup>d</sup> Department of Chemistry, University of Central Florida, Orlando, FL 32816, United States

\*E-mail: Xiaofeng.Feng@ucf.edu

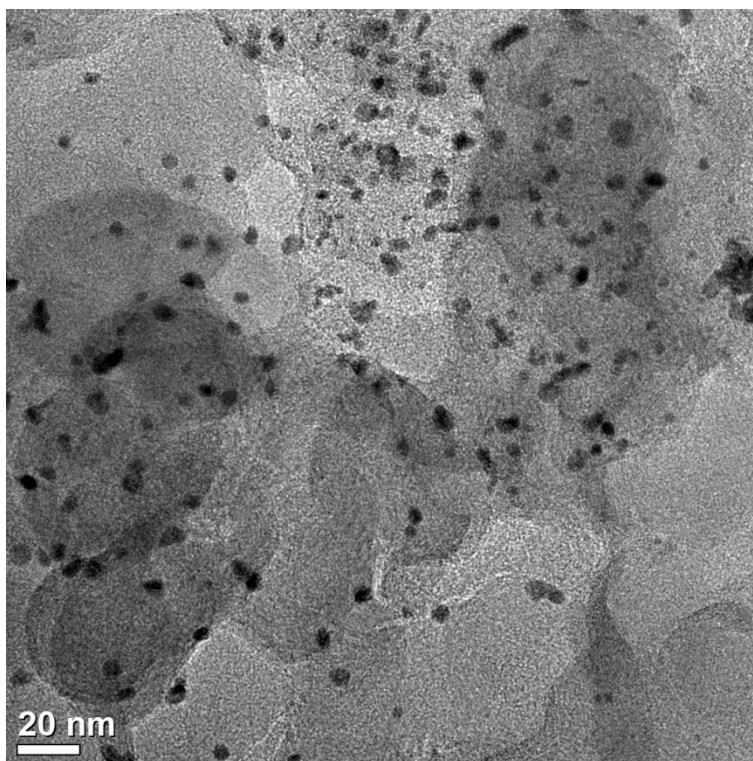

**Fig. S1.** Overview TEM image of the carbon-black-supported  $\text{Pt}_{0.2}\text{Ni}_{0.8}\text{-L}$  nanoparticles.

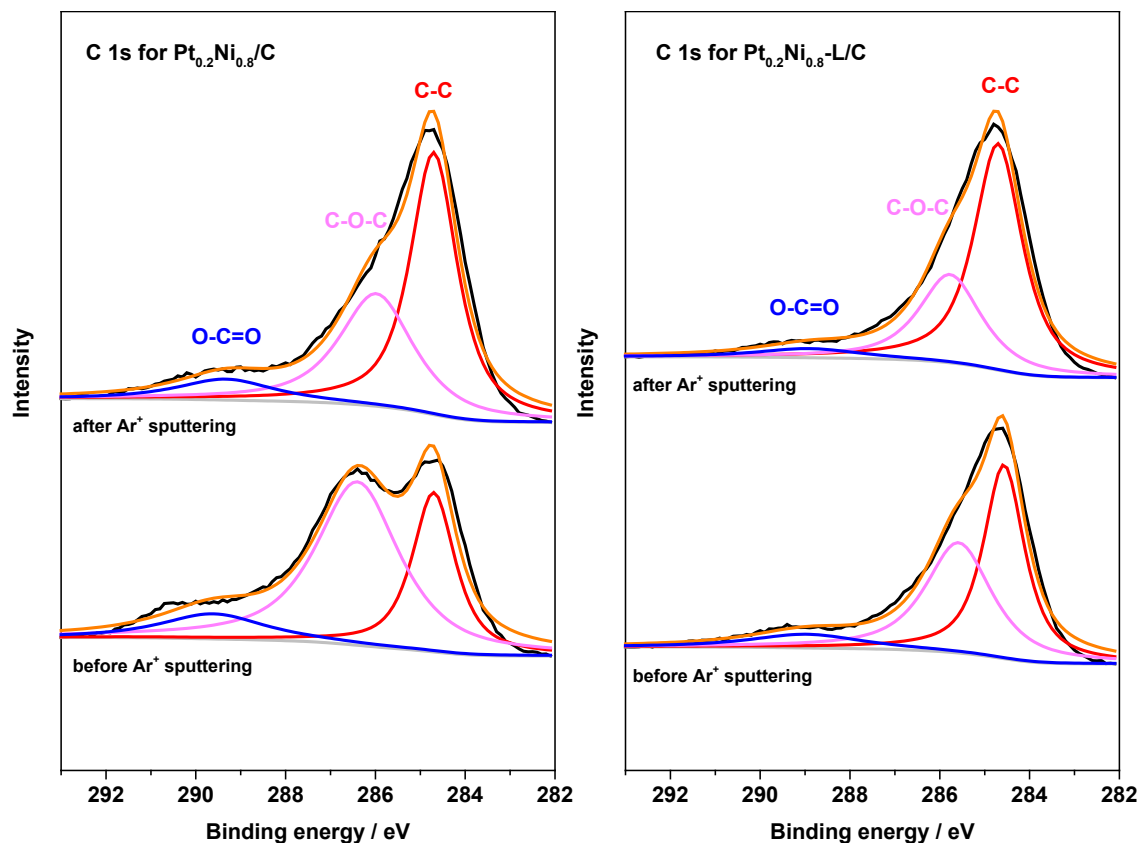

**Fig. S2.** XPS C 1s spectra of carbon-black-supported Pt<sub>0.2</sub>Ni<sub>0.8</sub> and Pt<sub>0.2</sub>Ni<sub>0.8</sub>-L catalysts before and after Ar<sup>+</sup> sputtering, respectively. Deconvolutions of the peaks are provided; in addition to the C-C peak at 284.8 eV, two additional features are present at ~286 eV and ~289 eV in all spectra in positions consistent with the typical O-containing carbonaceous species among other possibilities (that is, C-O-C and O-C=O, respectively). The carbon black support of the Pt<sub>0.2</sub>Ni<sub>0.8</sub> catalyst appears to contain a greater abundance of more readily removed terminal functional groups in the “C-O-C” designated binding energy region relative to the Pt<sub>0.2</sub>Ni<sub>0.8</sub>-L sample.

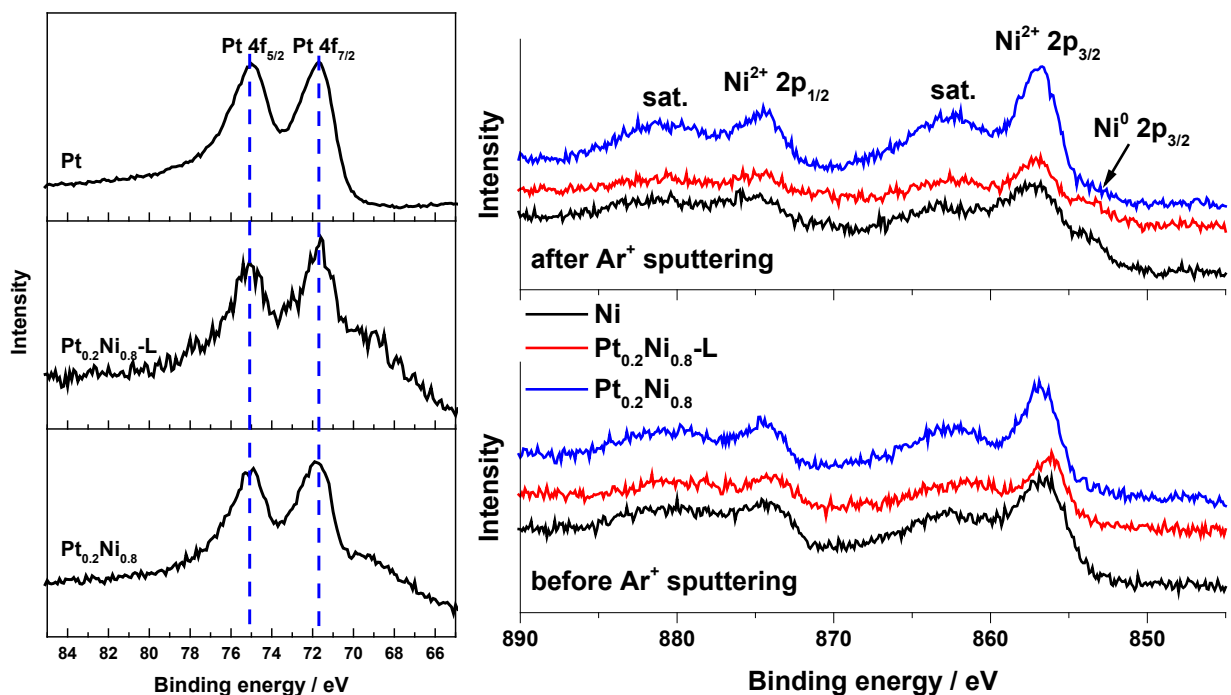

**Fig. S3.** XPS spectra in the Pt 4f and Ni 2p regions for Pt<sub>0.2</sub>Ni<sub>0.8</sub> and Pt<sub>0.2</sub>Ni<sub>0.8</sub>-L samples. In the Pt 4f region, two peaks with binding energies of 71.7 and 75.0 eV are observed, corresponding to the 4f<sub>7/2</sub> and 4f<sub>5/2</sub> levels of metallic Pt<sup>0</sup>. Unlike Pt, the Ni on the surface is not detected in a metallic state after transfer through air into the XPS vacuum system (lower frame), but is instead present in an oxidized form consistent with Ni<sup>2+</sup>. After mild sputtering with 2 kV Ar<sup>+</sup> (upper frame), a Ni<sup>0</sup> shoulder shows up, which is more likely due to the exposure of subsurface metallic Ni within the supported particles.

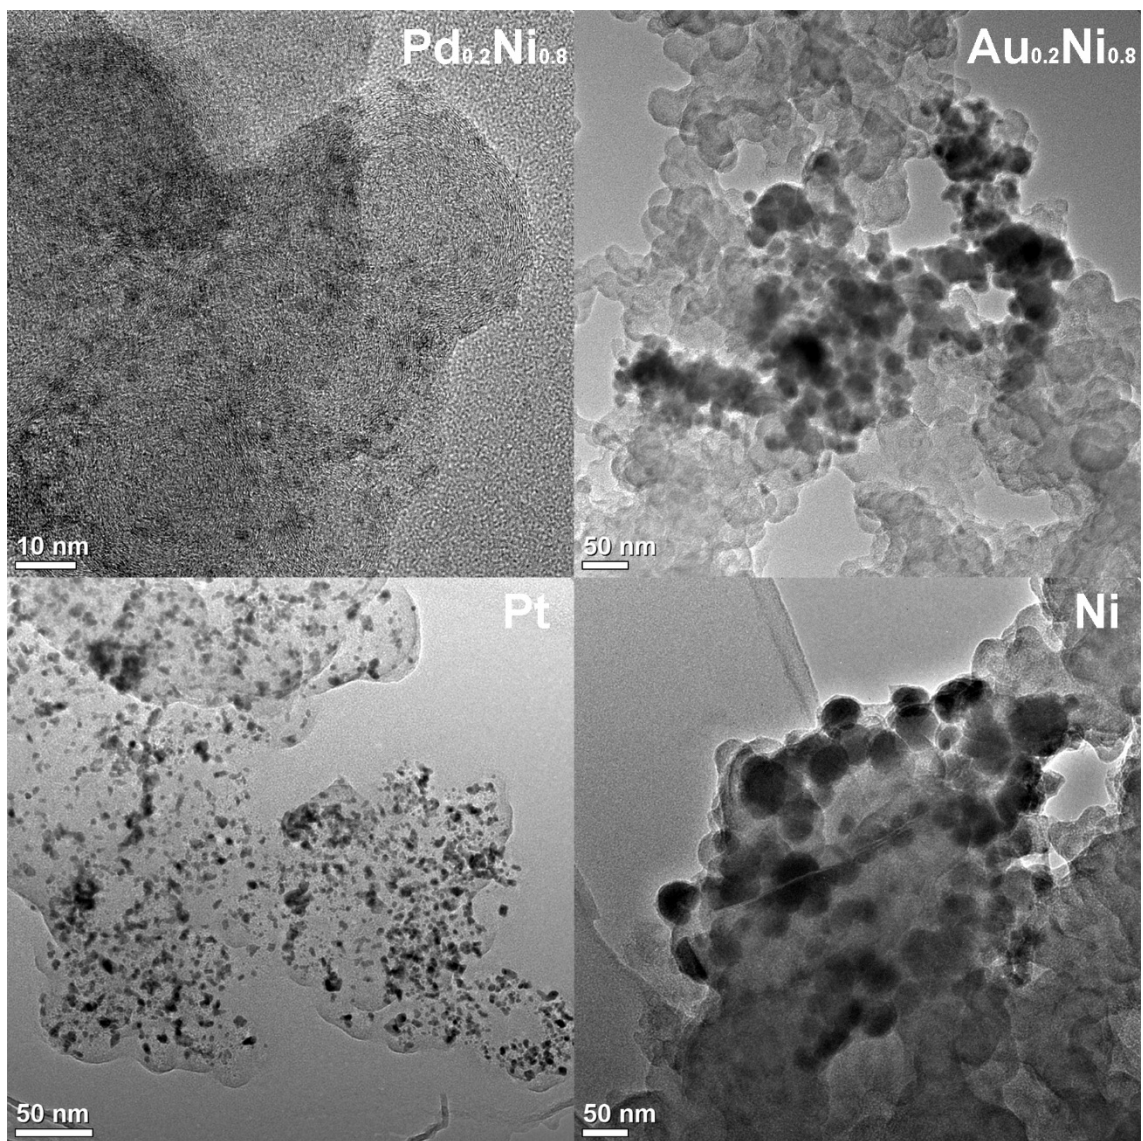

**Fig. S4.** Representative TEM images of the carbon-black-supported Pd<sub>0.2</sub>Ni<sub>0.8</sub>, Au<sub>0.2</sub>Ni<sub>0.8</sub>, Pt, and Ni nanoparticles. A comparison of the images may indicate that the precipitation-reduction method is more effective for the synthesis of ultrafine and homogenous Pd<sub>0.2</sub>Ni<sub>0.8</sub> nanoparticles.

**Table S1.** A summary of the actual metal contents by mass in the catalysts, which were determined by inductively coupled plasma mass spectrometry (ICP-MS).

|                                             | <b>M content / wt%</b> | <b>Ni content / wt%</b> |
|---------------------------------------------|------------------------|-------------------------|
| <b>Pt<sub>0.2</sub>Ni<sub>0.8</sub>/C</b>   | 14.5                   | 17.2                    |
| <b>Pt<sub>0.2</sub>Ni<sub>0.8</sub>-L/C</b> | 14.5                   | 17.2                    |
| <b>Pd<sub>0.2</sub>Ni<sub>0.8</sub>/C</b>   | 8.1                    | 20.1                    |
| <b>Au<sub>0.2</sub>Ni<sub>0.8</sub>/C</b>   | 7.5                    | 17.2                    |
| <b>Pt/C</b>                                 | 49.5                   | 0                       |
| <b>Ni/C</b>                                 | 0                      | 21.1                    |

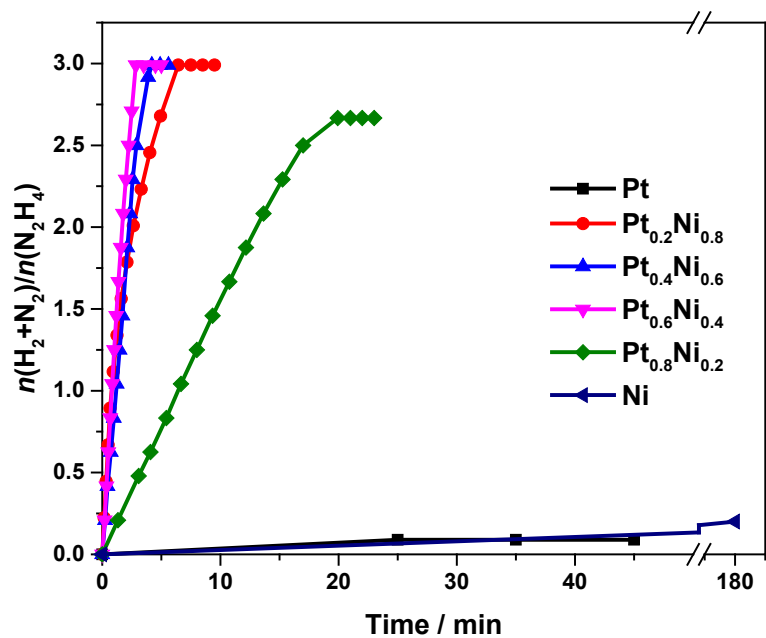

**Fig. S5.** Time-course plots for the catalytic decomposition of  $\text{N}_2\text{H}_4 \cdot \text{H}_2\text{O}$  over  $\text{Pt}_x\text{Ni}_{(1-x)}$  catalysts in 1 M NaOH solution at 50 °C.

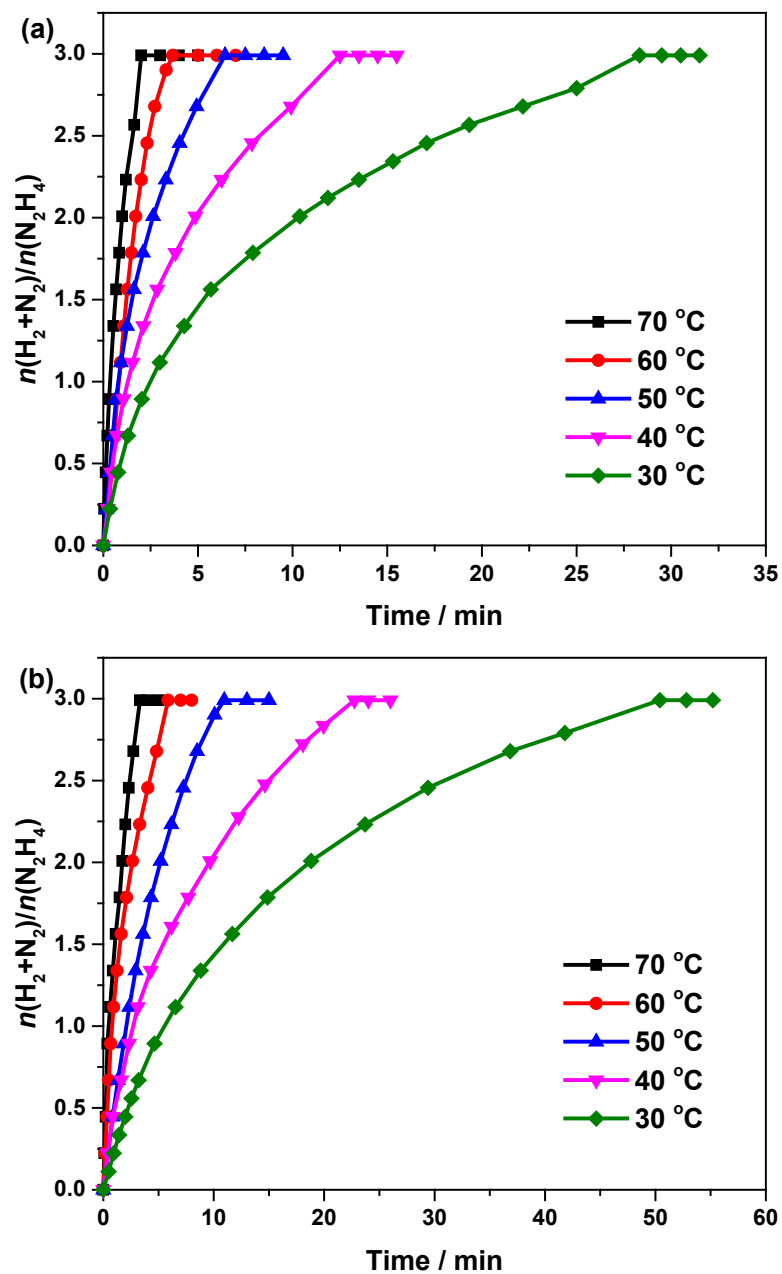

**Fig. S6.** Time-course plots for the catalytic decomposition of  $\text{N}_2\text{H}_4 \cdot \text{H}_2\text{O}$  on the (a)  $\text{Pt}_{0.2}\text{Ni}_{0.8}$  and (b)  $\text{Pt}_{0.2}\text{Ni}_{0.8}\text{-L}$  catalysts in 1 M NaOH solution at different temperatures.



**Table S2.** Comparison of the activity for hydrazine dehydrogenation over different catalysts.

| Catalyst                                                                                | Additive | Temp. / K | Selectivity for H <sub>2</sub> / % | TOF / h <sup>-1</sup> | E <sub>a</sub> / kJ mol <sup>-1</sup> | Reference                                               |
|-----------------------------------------------------------------------------------------|----------|-----------|------------------------------------|-----------------------|---------------------------------------|---------------------------------------------------------|
| Pt <sub>0.2</sub> Ni <sub>0.8</sub> /C                                                  | NaOH     | 323       | 100                                | 673                   | 45.7                                  | This work                                               |
| Ni <sub>88</sub> Pt <sub>12</sub> @MIL-101                                              | NaOH     | 323       | 100                                | 350                   | 55.5                                  | <i>Int. J. Hydrogen Energy</i> , 2014, <b>39</b> , 9726 |
| Ni <sub>66</sub> Rh <sub>34</sub> @ZIF-8                                                | NaOH     | 323       | 100                                | 140                   | 58.1                                  | <i>ChemCatChem</i> , 2014, <b>6</b> , 2549              |
| NiRh <sub>4</sub>                                                                       | /        | 298       | 100                                | 9.6                   | /                                     | <i>J. Am. Chem. Soc.</i> , 2009, <b>131</b> , 18032     |
| NiRh <sub>4.4</sub> /graphene                                                           | NaOH     | 298       | 100                                | 13.7                  | /                                     | <i>Energy Environ. Sci.</i> , 2012, <b>5</b> , 6885     |
| Ni <sub>0.9</sub> Pt <sub>0.1</sub> /Ce <sub>2</sub> O <sub>3</sub>                     | NaOH     | 298       | 100                                | 28.1                  | 42.3                                  | <i>J. Mater. Chem. A</i> , 2013, <b>1</b> , 14957       |
| Ni <sub>0.95</sub> Ir <sub>0.05</sub>                                                   | /        | 298       | 100                                | 2.2                   | /                                     | <i>Chem. Commun.</i> , 2010, <b>46</b> , 6545           |
| Ni/Al <sub>2</sub> O <sub>3</sub>                                                       | /        | 303       | 93                                 | 2.2                   | 49.3                                  | <i>Angew. Chem., Int. Ed.</i> , 2012, <b>51</b> , 6191  |
| Rh                                                                                      | /        | 298       | 43.8                               | 2.5                   | /                                     | <i>J. Am. Chem. Soc.</i> , 2009, <b>131</b> , 9894      |
| (Ni <sub>5</sub> Pt <sub>5</sub> ) <sub>1</sub> -(CeO <sub>x</sub> ) <sub>0.3</sub> /NG | NaOH     | 298       | 100                                | 408                   | 38.7                                  | <i>Nano Res.</i> , 2017, <b>10</b> , 2856               |
| Pt <sub>0.6</sub> Ni <sub>0.4</sub> /PDA-rGO                                            | NaOH     | 303       | 100                                | 903                   | 33.4                                  | <i>J. Mater. Chem. A</i> , 2015, <b>3</b> , 23090       |
| Ni <sub>0.58</sub> Pt <sub>0.42</sub> /graphene                                         | NaOH     | 323       | 100                                | 846                   | 23.9                                  | <i>J. Alloy. Compd.</i> , 2017, <b>695</b> , 3036       |

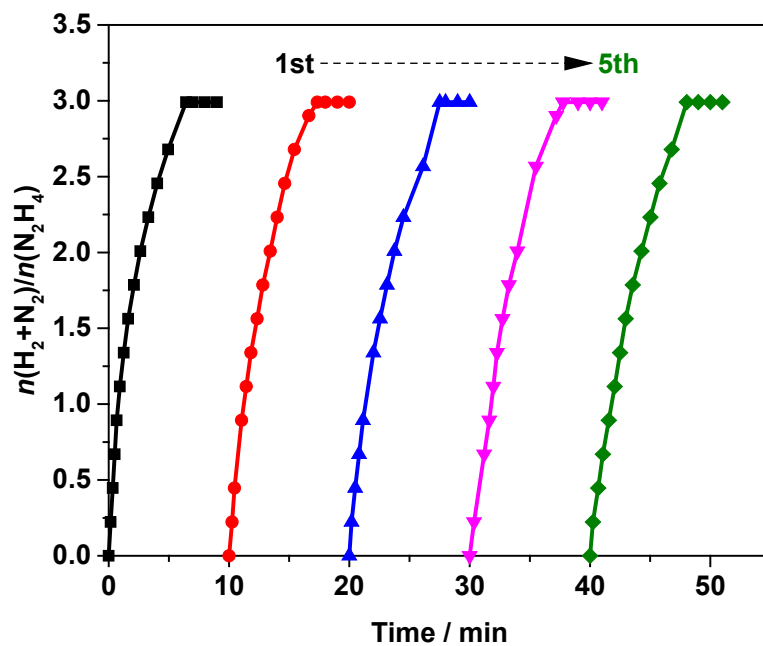

**Fig. S7.** Durability test of the  $\text{Pt}_{0.2}\text{Ni}_{0.8}$  catalyst for complete decomposition of  $\text{N}_2\text{H}_4 \cdot \text{H}_2\text{O}$  in 1 M NaOH at 50 °C. Additional aliquot of  $\text{N}_2\text{H}_4 \cdot \text{H}_2\text{O}$  was introduced into the reaction vessel after the completion of the previous run.

**Table S3.** The pH values of 0.1 M PBS with different concentrations of N<sub>2</sub>H<sub>4</sub>.

| $c(\text{N}_2\text{H}_4) / \text{M}$ | <b>0</b> | <b>0.1</b> | <b>0.3</b> | <b>0.5</b> |
|--------------------------------------|----------|------------|------------|------------|
| <b>pH</b>                            | 7.2      | 8.6        | 9.2        | 9.5        |
